# Supplementary material for: Assessing inorganic nanoparticle toxicity through omics approaches
Source: Royal Society of Chemistry journal article supplement (doi:10.1039/d4nr02328e), 2024-01-01
Supplement: d4nr02328e1.pdf [file d4nr02328e1.pdf]

**- Supporting Information -**

**Assessing Inorganic Nanoparticle Toxicity through Omics Approaches**

Yanchen Li,<sup>1</sup> Christopher Vulpe,<sup>2</sup> Twan Lammers,<sup>1</sup> and Roger M. Pallares<sup>1,\*</sup>

<sup>1</sup> Institute for Experimental Molecular Imaging, RWTH Aachen University Hospital, Aachen 52074, Germany

<sup>2</sup> Center for Environmental and Human Toxicology, Department of Physiological Sciences, College of Veterinary Medicine, University of Florida, Gainesville, FL, 32611, USA

\* Corresponding author: [rmoltopallar@ukaachen.de](mailto:rmoltopallar@ukaachen.de)

**Table of Contents**

Figure S1. Overview of omics techniques for assessing nanoparticle toxicity .....S2

Figure S2. Summary of omics studies that characterize the toxicity of nanoparticles. ....S3

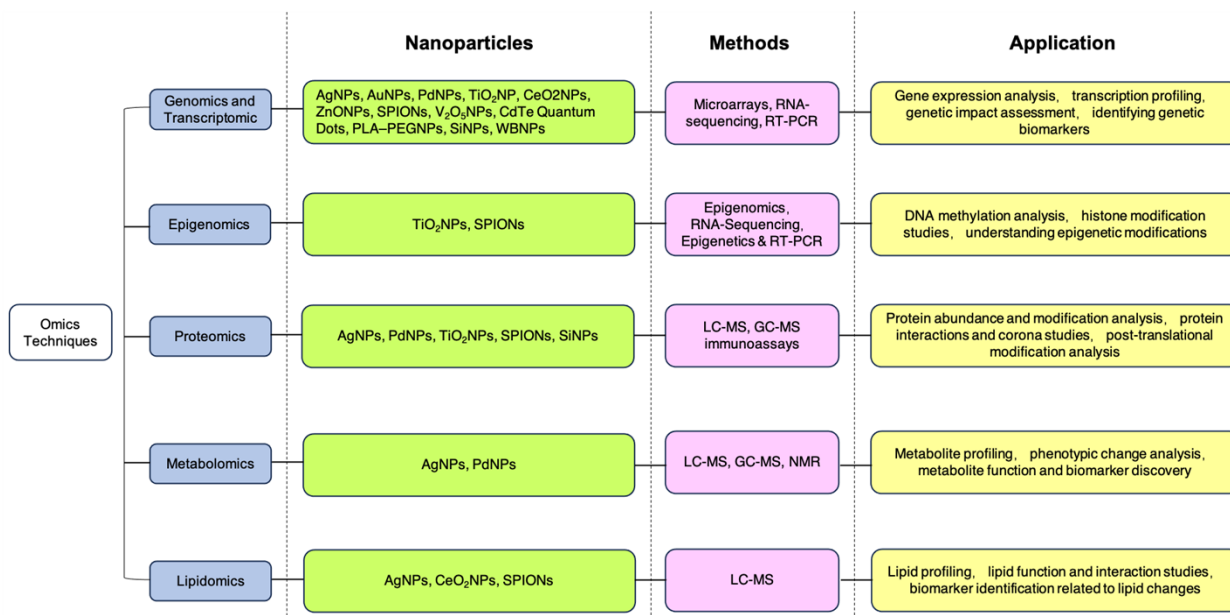

**Figure S1. Overview of the omics techniques used for assessing nanoparticle toxicity discussed in the review.**

**Table S1. Summary of omics studies that characterize the toxicity of nanoparticles**

| Nanoparticle properties |                |           | Shell properties                                               |                                                                                            | Toxicity testing |                                                                             |                 | Ref.           |
|-------------------------|----------------|-----------|----------------------------------------------------------------|--------------------------------------------------------------------------------------------|------------------|-----------------------------------------------------------------------------|-----------------|----------------|
| Type                    | Size (nm)      | Shape     | Shell material                                                 | Charge                                                                                     | Testing type     | Model                                                                       | Omics           |                |
| AgNPs                   | 20             | Spherical | n/a                                                            | n/a                                                                                        | In vitro         | Human dermal fibroblasts-fetal (HDF-f) cells                                | Transcriptomics | <sup>100</sup> |
| AgNPs                   | 20             | Spherical | n/a                                                            | n/a                                                                                        | In vitro         | Human dermal fibroblasts-fetal (HDF-f) cells                                | Transcriptomics | <sup>101</sup> |
| AgNPs                   | 10, 30, and 60 | Spherical | Citrate, polyethylene glycol (PEG), bovine serum albumin (BSA) | Citrate-coated NPs: Negative (-29 ~ 43 mV)<br>PEG-/BSA- coated NPs: Negative (-12 ~ 18 mV) | In vitro         | Human skin keratinocytes (HaCaT) cells                                      | Metabolomics    | <sup>102</sup> |
| AgNPs                   | 15.9 ± 7.6     | Spherical | Citrate                                                        | Negative (-21.6 ± 1.3 mV)                                                                  | In vitro         | Human lung epithelial (A549) cells                                          | Transcriptomics | <sup>105</sup> |
| AgNPs                   | 5 and 100      | Spherical | PVP                                                            | n/a                                                                                        | In vitro         | Human endothelial (EA.hy926) cells and bronchial epithelial (BEAS-2B) cells | Transcriptomics | <sup>106</sup> |
| AgNPs                   | 7-10           | n/a       | Polyethylenimine                                               | n/a                                                                                        | In vitro         | Human hepatoma (HepG2) cells                                                | Transcriptomics | <sup>109</sup> |
| AgNPs                   | 16.1 ± 5.3     | Spherical | PVP                                                            | Negative (-19 mV)                                                                          | In vitro         | Carp gill mitochondria                                                      | Proteomics      | <sup>110</sup> |
| AgNPs                   | 20-50          | Spherical | GSH                                                            | Negative (-8~10 mV)                                                                        | In vitro         | Human hepatoma (HepG2) cells                                                | Transcriptomics | <sup>111</sup> |
| AgNPs                   | 91.7 ± 1.6     | Spherical | n/a                                                            | Negative (- 6.3 ± 0.4 mV)                                                                  | In vitro         | Human hepatoma (HepG2) cells                                                | Lipidomics      | <sup>77</sup>  |
| AgNPs                   | 30             | Spherical | Citrate                                                        | n/a                                                                                        | In vitro         | Human colon adenocarcinoma (Caco-2) cells                                   | Proteomics      | <sup>112</sup> |
| AgNPs                   | 25             | n/a       | n/a                                                            | n/a                                                                                        | In vivo          | Colon tissue of male C57BL/6J mice                                          | Transcriptomics | <sup>115</sup> |
| AgNPs                   | 10 and 40      | Spherical | Citrate                                                        | n/a                                                                                        | In vivo          | Zebrafish embryos                                                           | Transcriptomics | <sup>116</sup> |
| AgNP                    | 25.5           | n/a       | n/a                                                            | n/a                                                                                        | In vivo          | Zebrafish embryos                                                           | Metabolomics    | <sup>117</sup> |
| AuNPs                   | 21.8 ± 4.8     | Spherical | Citrate                                                        | n/a                                                                                        | In vitro         | Human dermal fibroblast (HDF-f) cells                                       | Transcriptomics | <sup>127</sup> |
| AuNPs                   | 20             | Spherical | n/a                                                            | n/a                                                                                        | In vitro         | Human lung epithelial (A549) cells                                          | Metabolomics    | <sup>128</sup> |
| PdNPs                   | 10             | Spherical | Hesperidin                                                     | Negative (-15.4 ± 1.3mV)                                                                   | In vitro         | Human ovarian cancer (SKOV3) cells                                          | Transcriptomics | <sup>141</sup> |
| PdNPs                   | 141.3 ± 5.5    | Spherical | n/a                                                            | Positive (49.2 ± 1.9mV)                                                                    | In vivo          | Earthworms                                                                  | Transcriptomics | <sup>142</sup> |
| PdNPs                   | 10 ± 6         | n/a       | n/a                                                            | Negative (-25.9 ± 5.6 mV)                                                                  | In vitro         | rat embryo fibroblasts (Rat-1) and human lung epithelial (A549) cells       | Proteomics      | <sup>143</sup> |

|                                   |                |                                                   |                                         |                           |                      |                                                                               |                                  |     |
|-----------------------------------|----------------|---------------------------------------------------|-----------------------------------------|---------------------------|----------------------|-------------------------------------------------------------------------------|----------------------------------|-----|
| TiO <sub>2</sub> NPs              | 7, 20, and 200 | n/a                                               | n/a                                     | n/a                       | In vitro             | Human epidermal keratinocyte (HaCaT) cells                                    | Transcriptomics                  | 169 |
| TiO <sub>2</sub> NPs              | 20.6           | Spherical                                         | n/a                                     | n/a                       | In vivo              | Bronchoalveolar lavage (BAL) and lung tissue of female C57BL/6 mice           | Transcriptomics and proteomics   | 171 |
| TiO <sub>2</sub> NPs              | 6              | n/a                                               | Hydroxypropyl methylcellulose (HPMC)    | Positive (9.28 mV)        | In vitro             | Bronchoalveolar lavage (BAL) and lung tissue of female CD-1 mice              | Transcriptomics                  | 172 |
| TiO <sub>2</sub> NPs              | 25             | Spherical                                         | n/a                                     | Negative (-21.0 ± 0.7 mV) | In vitro             | Human hepatoma (HepG2) cells                                                  | Transcriptomics                  | 177 |
| TiO <sub>2</sub> NPs              | 25             | Spherical                                         | n/a                                     | Negative (-10.8 mV)       | In vivo              | Lung tissue of female NIH mice                                                | Transcriptomics and epigenomics  | 173 |
| TiO <sub>2</sub> NPs              | n/a            | n/a                                               | n/a                                     | n/a                       | In vitro             | Lung fibroblast (MRC5) cells                                                  | Epigenomics                      | 174 |
| TiO <sub>2</sub> NPs              | < 25           | Spherical                                         | n/a                                     | n/a                       | In vitro             | Human epidermal keratinocytes (HaCaT) cells                                   | Transcriptomics and proteomics   | 170 |
| CeO <sub>2</sub> NPs              | 4.0 ± 1.1      | n/a                                               | Tetra-methyl ammonium hydroxide (TMAOH) | Negative (-45 mV)         | In vitro             | Human lung epithelial (A549) cells and bronchial (BEAS-2B) epithelial cells   | Transcriptomics                  | 205 |
| CeO <sub>2</sub> NPs              | 8              | Spherical                                         | n/a                                     | n/a                       | In vivo              | Lung tissue of Sprague-Dawley (SD) rats                                       | Lipidomics and transcriptomics   | 8   |
| ZnONPs                            | 100 and 300    | n/a                                               | Triethoxycaprylylsilane                 | n/a                       | In vivo              | Bronchoalveolar lavage (BAL) fluid cellularity of female C57BL/6J BomTac mice | Transcriptomics                  | 184 |
| ZnONPs                            | 20–50          | Spherical                                         | n/a                                     | Positive (20.0 ± 6.5 mV)  | In vitro and in vivo | Human hepatoma (HepG2) cells                                                  | Transcriptomics                  | 185 |
| ZnONPs                            | 158            | Rectangular, rod, spherical, and irregular shapes | n/a                                     | Negative (-19 ± 1 mV)     | In vitro             | Alveolar macrophages (NR8383)                                                 | Transcriptomics and proteomics   | 188 |
| ZnONPs                            | 355.6 ± 68.2   | Spherical                                         | n/a                                     | Negative (-17.9 ± 0.2 mV) | In vivo              | Female and male zebrafish (Danio rerio)                                       | Transcriptomics and metabolomics | 186 |
| NiONPs                            | 750            | n/a                                               | n/a                                     | n/a                       | In vitro             | Human bronchial epithelial (BEAS-2B) cells                                    | Transcriptomics                  | 208 |
| SPIONs                            | 10             | Irregular                                         | Citric acid                             | Negative (-40 mV)         | In vitro             | Human submandibular gland (HSG) cells                                         | Transcriptomics and epigenomics  | 195 |
| SPIONs                            | 20             | n/a                                               | n/a                                     | Positive (27.4 ± 1.1 mV)  | In vitro             | Mouse macrophage (RAW 264.7) cells                                            | Proteomics and lipidomics        | 197 |
| V <sub>2</sub> O <sub>5</sub> NPs | 36 ± 2         | Irregular                                         | n/a                                     | n/a                       | In vitro             | Human bronchial epithelial (BEAS-2B) cells                                    | Metabolomics                     | 206 |
| CdTe quantum dots                 | 55.6           | n/a                                               | n/a                                     | n/a                       | In vitro             | Human monocyte (THP-1) cells                                                  | Proteomics                       | 218 |
| SiNPs                             | 65.0 ± 7.4     | Spherical                                         | n/a                                     | Negative (-20.5 ± 1.5 mV) | In vitro             | Spermatocyte (GC-2spd) cells                                                  | Transcriptomics                  | 223 |
| SiNPs                             | 58             | Spherical                                         | n/a                                     | Negative (-30 mV)         | In vitro             | Human hepatic (L-02) cells                                                    | Metabolomics and proteomics      | 224 |

|                                    |         |           |          |                    |                      |                                                |                                              |                |
|------------------------------------|---------|-----------|----------|--------------------|----------------------|------------------------------------------------|----------------------------------------------|----------------|
| WBNPs                              | 149     | n/a       | n/a      | n/a                | In vitro             | Human lung alveolar epithelial (HPAEpiC) cells | Transcriptomics                              | <sup>147</sup> |
| PtNPs                              | 5-45    | Spherical | Lycopene | n/a                | In vitro             | Human acute monocytic leukemia (THP-1) cells   | Transcriptomics                              | <sup>155</sup> |
| Gd <sub>2</sub> O <sub>3</sub> NPs | 3-4     | n/a       | n/a      | n/a                | In vitro and in vivo | 4T1 breast cancer cells and female Bal/bc mice | Genomics, transcriptomics and metabolomics   | <sup>209</sup> |
| MoO <sub>2</sub> NPs               | 64 ± 18 | Spherical | PVP      | Negative (<-30 mV) | In vitro             | Rat type II alveolar epithelial cells          | Transcriptomics, metabolomics and proteomics | <sup>211</sup> |
| Mn <sub>3</sub> O <sub>4</sub> NPs | 100     | n/a       | n/a      | n/a                | In vitro             | Lung epithelial (CCL-149) cells                | Transcriptomics                              | <sup>210</sup> |
